# Supplementary material for: Atonal homolog 1 Is a Tumor Suppressor Gene
Source: PLOS journal article supplement (doi:10.1371/journal.pbio.1000039), 2009-02-20
Supplement: S1 (10.1371/journal.pbio.1000039.s001) [file journal.pbio.1000039.s001]

# ***Atonal homologue 1* is a tumour suppressor gene**

Bossuyt *et al.*

Supplementary figures

---

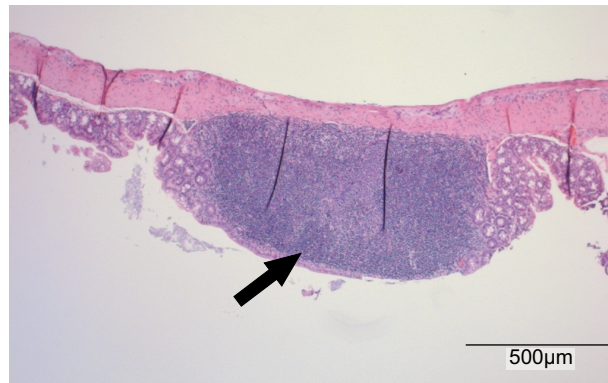

**Supplementary figure 1: Gut associated lymphoid tissues in AOM-treated *Atoh1*<sup>wt</sup> mice.** The colons of AOM-treated *Atoh1*<sup>wt</sup> mice showed large gut associated lymphoid tissues (GALT) that were macroscopically counted as polyps. 5x magnification of representative colonic GALTs. Galt indicated by an arrow.
