# Supplementary material for: Atonal homolog 1 Is a Tumor Suppressor Gene
Source: PLOS journal article supplement (doi:10.1371/journal.pbio.1000039), 2009-02-20
Supplement: S5 (10.1371/journal.pbio.1000039.s005) [file journal.pbio.1000039.s005]

| patient | primer set 1 | primer set 2 | primer set 1      | primer set 2      | mRNA expression |        | microscopy     | metastasis | methylcollector | Apal       | bisulfite PCR |
|---------|--------------|--------------|-------------------|-------------------|-----------------|--------|----------------|------------|-----------------|------------|---------------|
| 1       | 0.059        | 0.826        | 2 deletions       | no deletion       | 0.066           | low    | adenocarcinoma | no         | methylated      | methylated | no            |
| 2       | 0.485        | 0.655        | 1 deletion        | 1 deletion        | 0.082           | low    | adenocarcinoma | no         | methylated      | methylated | methylated    |
| 3       | 0.285        | 0.841        | 1 deletion        | no deletion       | 0.092           | low    | adenocarcinoma | no         | methylated      | methylated | methylated    |
| 4       | 0.076        | 0.590        | 2 deletions       | 1 deletion        | 0.280           | normal | adenocarcinoma | no         | methylated      | no         | no            |
| 5       | 1.434        | 1.474        | 1 duplication     | 1 duplication     | 0.018           | low    | adenocarcinoma | no         | methylated      | methylated | methylated    |
| 6       | 0.390        | 1.248        | 1 deletion        | no deletion       | 0.265           | normal | adenoma        | no         | methylated      | methylated | methylated    |
| 7       | 0.983        | 0.847        | no deletion       | no deletion       | 0.167           | low    | adenocarcinoma | no         | methylated      | methylated | no            |
| 8       | 1.464        | 1.061        | 1 duplication     | no deletion       | 0.191           | low    | adenocarcinoma | no         | methylated      | no         | no            |
| 9       | 1.449        | 1.310        | 1 duplication     | 1 duplication     | 0.267           | normal | adenocarcinoma | no         | no              | no         | no            |
| 10      | 0.143        | 0.388        | 2 deletions       | 1 deletion        | 0.286           | normal | adenocarcinoma | no         | no              | no         | no            |
| 11      | 1.905        | 1.275        | 2 duplications    | no deletion       | 0.104           | low    | adenocarcinoma | no         | methylated      | methylated | methylated    |
| 12      | 0.512        | 1.301        | 1 deletion        | 1 duplication     | 0.016           | low    | adenocarcinoma | yes        | methylated      | methylated | methylated    |
| 13      | 0.030        | 0.457        | 2 deletions       | 1 deletion        | 0.146           | low    | adenocarcinoma | no         | methylated      | no         | no            |
| 14      | 2.196        | 1.366        | 2 duplications    | 1 duplication     | 0.003           | low    | adenocarcinoma | yes        | no              | no         | no            |
| 15      | 1.324        | 0.908        | 1 duplication     | no deletion       | 0.039           | low    | adenocarcinoma | no         | methylated      | methylated | no            |
| 16      | 1.459        | 0.498        | 1 duplication     | 1 deletion        | 0.354           | normal | adenocarcinoma | no         | no              | no         | no            |
| 17      | 0.338        | 0.265        | 1 deletion        | 1 deletion        | 0.009           | low    | adenoma        | no         | methylated      | no         | no            |
| 18      | 0.969        | 0.662        | no deletion       | 1 deletion        | 3.138           | high   | adenoma        | no         | methylated      | methylated | methylated    |
| 19      | 0.383        | 0.500        | 1 deletion        | 1 deletion        | 0.045           | low    | adenocarcinoma | no         | methylated      | methylated | methylated    |
| 20      | 0.516        | 0.737        | 1 deletion        | 1 deletion        | 0.013           | low    | adenocarcinoma | yes        | no              | no         | no            |
| 21      | 0.351        | 0.505        | 1 deletion        | 1 deletion        | 0.387           | normal | adenoma        | no         | methylated      | methylated | no            |
| 22      | 0.782        | 0.538        | no deletion       | 1 deletion        | 0.218           | low    | adenocarcinoma | no         | methylated      | no         | no            |
| 23      | 0.363        | 0.476        | 1 deletion        | 1 deletion        | 1.803           | high   | adenocarcinoma | no         | methylated      | methylated | no            |
| 24      | 0.281        | 0.332        | 1 deletion        | 1 deletion        | 0.966           | normal | adenoma        | no         | methylated      | methylated | no            |
| 25      | 0.480        | 0.821        | 1 deletion        | no deletion       | 0.470           | normal | adenoma        | no         | methylated      | no         | no            |
| 26      | 0.904        | 0.473        | no deletion       | 1 deletion        | 0.008           | low    | adenocarcinoma | yes        | methylated      | methylated | methylated    |
| 27      | 1.625        | 0.500        | 1 duplication     | 1 deletion        | 0.455           | normal | adenoma        | yes        | methylated      | methylated | methylated    |
| 28      | 0.455        | 0.437        | 1 deletion        | 1 deletion        | 0.354           | normal | adenoma        | yes        | methylated      | no         | no            |
| 29      | 2.000        | 3.719        | 2 duplications    | mult duplications | 0.134           | low    | adenocarcinoma | yes        | methylated      | methylated | no            |
| 30      | 2.630        | 3.215        | mult duplications | mult duplications | 73.772          | high   | adenocarcinoma | yes        | methylated      | methylated | methylated    |
| 31      | 1.227        | 0.588        | no deletion       | 1 deletion        | 0.000           | low    | adenocarcinoma | yes        | no              | no         | no            |
| 32      | 0.026        | 0.158        | 2 deletions       | 2 deletions       | 0.006           | low    | adenocarcinoma | no         | methylated      | no         | methylated    |
| 33      | 1.185        | 0.745        | no deletion       | 1 deletion        | 0.000           | low    | adenocarcinoma | no         | methylated      | no         | methylated    |
| 34      | 1.608        | 0.529        | 1 duplication     | 1 deletion        | 0.007           | low    | adenocarcinoma | no         | no              | methylated | no            |
| 35      | 2.387        | 1.925        | mult duplications | 2 duplications    | 0.032           | low    | adenocarcinoma | no         | methylated      | no         | no            |
| 36      | 2.990        | 2.732        | mult duplications | mult duplications | 0.000           | low    | adenocarcinoma | no         | methylated      | no         | no            |
| 37      | 1.796        | 1.586        | 2 duplications    | 1 duplication     | 0.003           | low    | adenocarcinoma | yes        | no              | methylated | no            |
| 38      | 0.771        | 0.997        | no deletion       | no deletion       | 0.068           | low    | adenocarcinoma | yes        | methylated      | methylated | no            |
| 39      | 0.674        | 1.840        | 1 deletion        | 2 duplications    | 0.047           | low    | adenoma        | yes        | no              | no         | no            |
| 40      | 0.745        | 0.712        | no deletion       | 1 deletion        | 0.022           | low    | adenoma        | yes        | methylated      | no         | methylated    |
| 41      | 0.601        | 0.351        | 1 deletion        | 1 deletion        | 0.046           | low    | adenocarcinoma | yes        | methylated      | methylated | no            |
| 42      | 0.168        | 0.307        | 2 deletions       | 1 deletion        | 0.000           | low    | adenocarcinoma | yes        | methylated      | methylated | methylated    |
| H29     | 0.871        | 0.435        | no deletion       | 1 deletion        | 0.007           | low    | adenocarcinoma | yes        | methylated      | no         | no            |
| 44      | 1.149        | 0.633        | no deletion       | 1 deletion        | **0.0378        |        | MCC            | yes        | methylated      | methylated | methylated    |
| 45      | 0.529        | 0.798        | 1 deletion        | no deletion       | **1.591         |        | MCC            | no         | methylated      | methylated | no            |
| 46      | 0.500        | 0.343        | 1 deletion        | 1 deletion        | **4.5           |        | MCC            | no         | methylated      | methylated | methylated    |
| MCC14.2 | 0.365        | 0.471        | 1 deletion        | 1 deletion        | **0.004         |        | MCC            | yes        | methylated      | methylated | no            |
| control | 1.000        | 1.000        | no deletion       | no deletion       | 1 ± 0.374       | normal | normal gut     | no         | no              |            | no            |

**Supplemental figure 5: summary table of all patient data.** First column indicates patient numbers. Next the relative ratios for ATOH1 gDNA over control locus is presented for each of the two primer sets as analysed by qPCR. The next two columns indicate the classification of the deletion/duplication status of the ATOH1 locus. The mRNA expression is shown relative to control colon samples, with next to it the classification of the expression. Clinical data are give in the third panel, namely cancer stage and metastasis. In the last panel, methylation of the ATOH1 locus is shown using three different methods.
